# Supplementary material for: Chemical Differentiation of Dendrobium officinale and Dendrobium devonianum by Using HPLC Fingerprints, HPLC‐ESI‐MS, and HPTLC Analyses
Source: Hindawi journal article supplement (doi:10.1155/2017/8647212), 2017-01-01
Supplement: f1 [file 8647212.f1.pdf]

1

## 2 Supporting figures

3

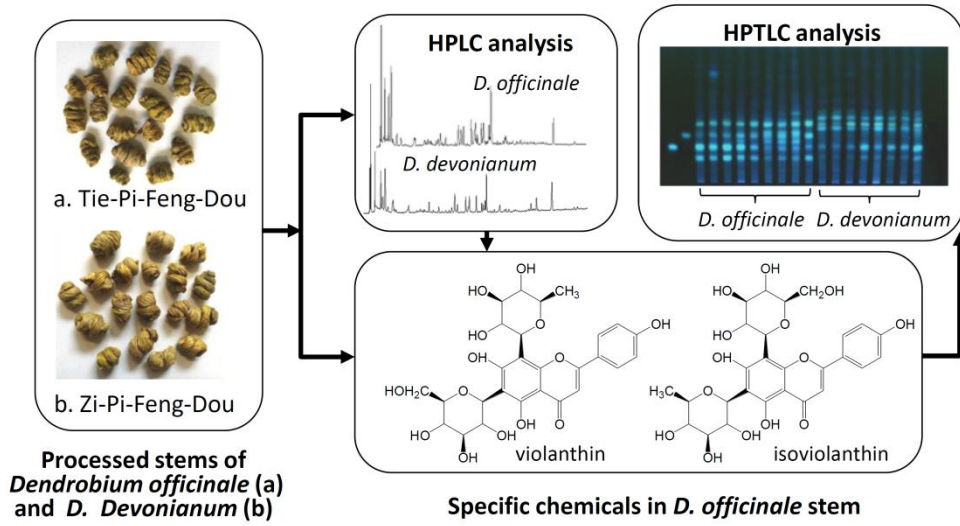

4

5

6

**Supporting Fig. 1** Graphical abstract

**Compound9: Vicenin-2**

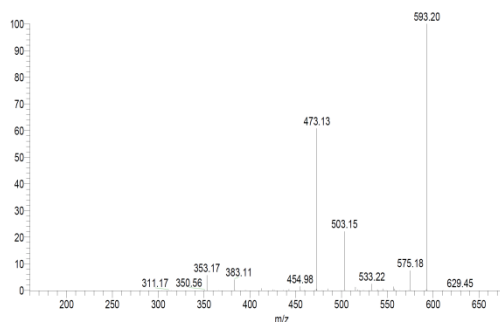

**Compound10: Apigenin-6-C- $\beta$ -D-xyloside-8-C- $\beta$ -D-glucoside**

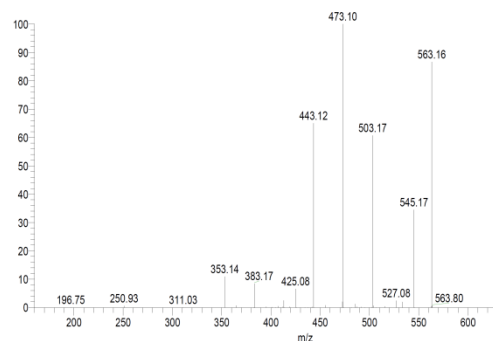

**Compound12: Isoshafotoside**

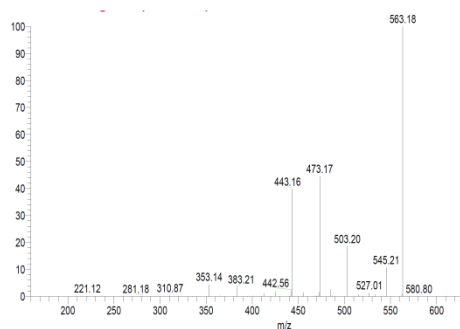

**Compound13: Shafotoside**

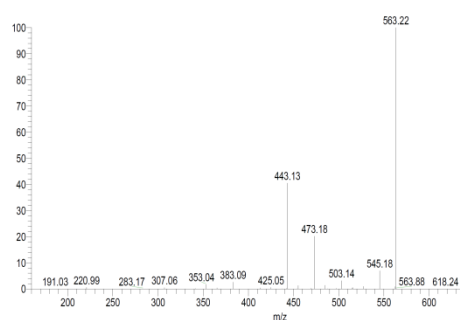

**Compound16: Apigenin-6-C- $\beta$ -D-glucoside-8-C- $\beta$ -D-xyloside**

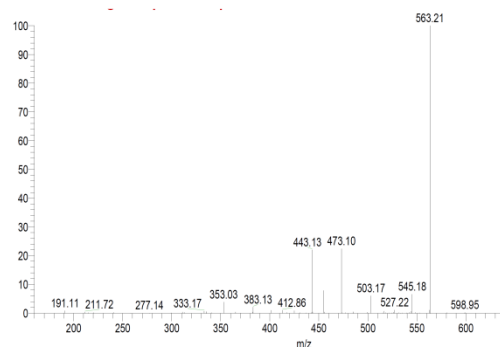

**Compound24: Apigenin-6-C-(2''-O- $\beta$ -D-glucopyranoside)- $\alpha$ -L-arabinoside**

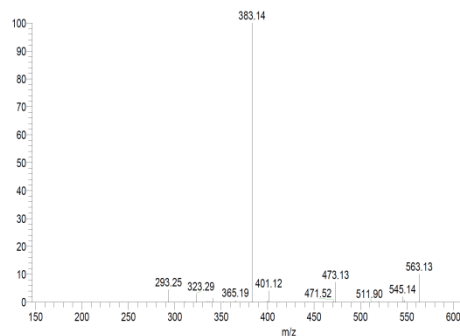

1

2

3 **Supporting Fig. 2** LC-MS/MS spectrums of vicenin-2,  
4 apigenin-6-C- $\beta$ -D-xyloside-8-C- $\beta$ -D-glucoside, isoshafotoside, shafotoside,  
5 apigenin-6-C- $\beta$ -D-glucoside-8-C- $\beta$ -D-xyloside and  
6 apigenin-6-C-(2''-O- $\beta$ -D-glucopyranoside)- $\alpha$ -L-arabinoside from the stem of *D. officinale*  
7 (negative ion mode) .

**Compound 17: Apigenin-6-C- $\beta$ -D-xyloside-8-C- $\beta$ -D-arabinoside**

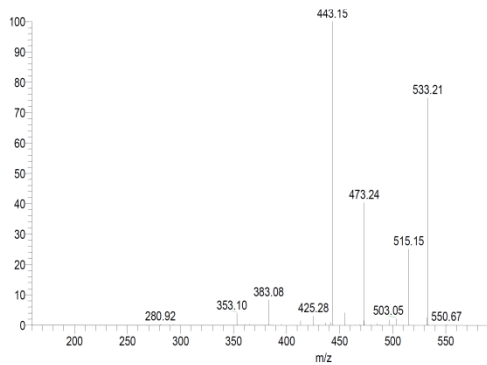

**Compound 18: Apigenin-6,8-di-C- $\alpha$ -L-arabinoside**

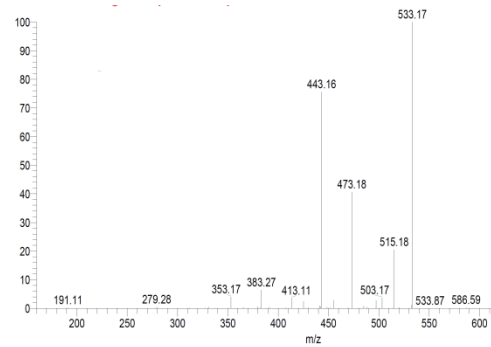

**Compound 23: Apigenin-6-C- $\alpha$ -L-arabinoside-8-C- $\beta$ -D-xyloside**

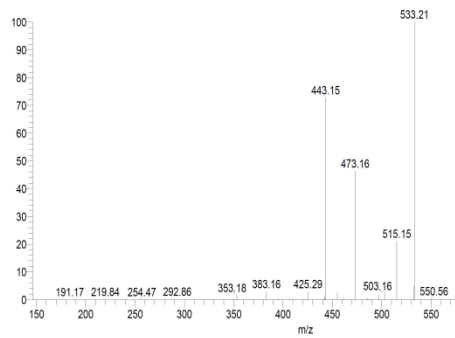

**Compound 14: Vitexin 2''-O- $\beta$ -D-glucopyranoside**

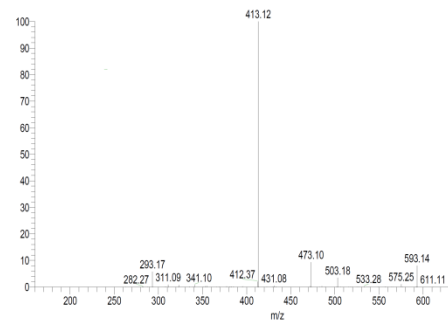

**Compound 19: Violanthin**

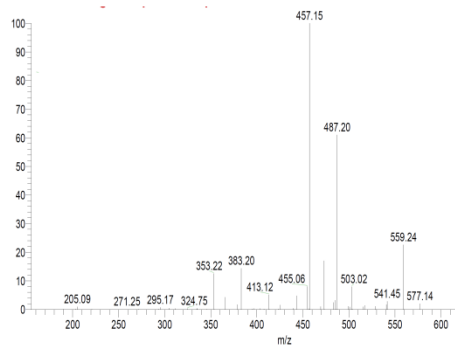

**Compound 20: Isoviolanthin**

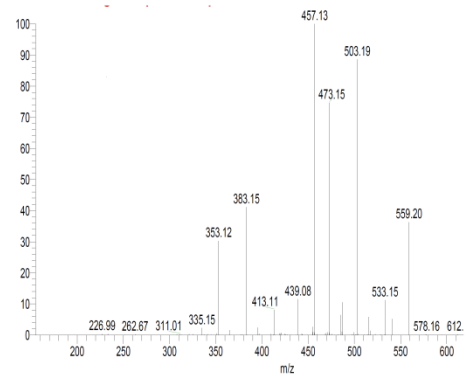

1

2

3 **Supporting Fig.3 LC-MS/MS spectrums of**  
4 **apigenin-6-C- $\beta$ -D-xyloside-8-C- $\beta$ -D-arabinoside, apigenin-6,8-di-C- $\alpha$ -L- arabinoside,**  
5 **apigenin-6-C- $\alpha$ -L-arabinoside-8-C- $\beta$ -D-xyloside, vitexin 2''-O- $\beta$ -D-glucopyranoside,**  
6 **violanthin and isoviolanthin from the stem of *D. officinale* (negative ion mode) .**

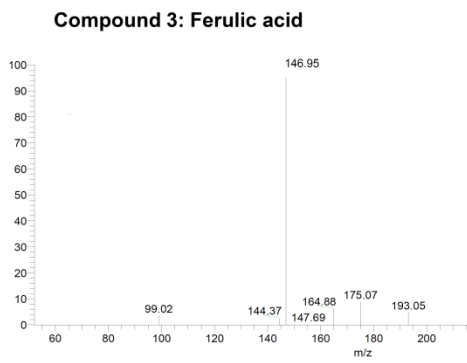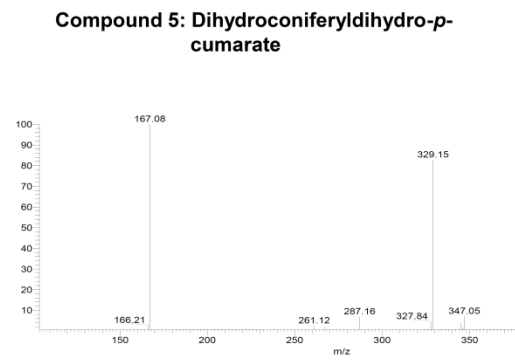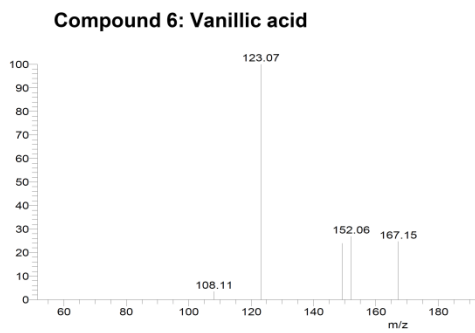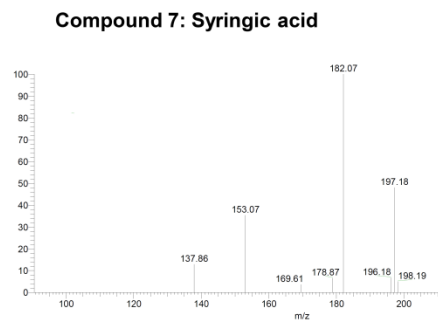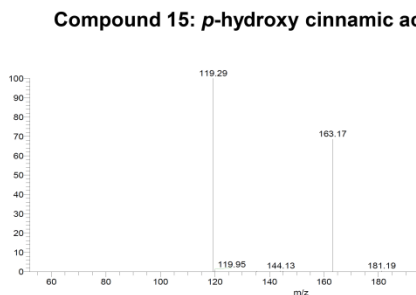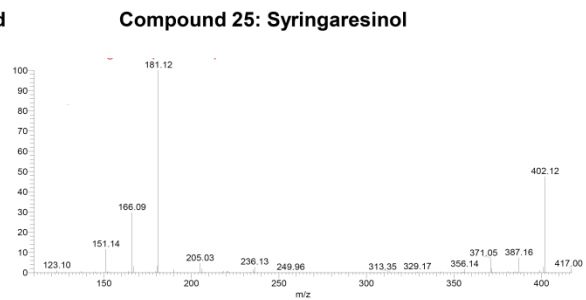

1  
2

3 **Supporting Fig. 4** LC-MS/MS spectrums of ferulic acid,  
 4 dihydroconiferyldihydro-*p*-cumarate, vanillic acid, syringic acid, *p*-hydroxycinnamic acid  
 5 and syringaresinol from the stem of *D. officinale* (negative ion mode) .

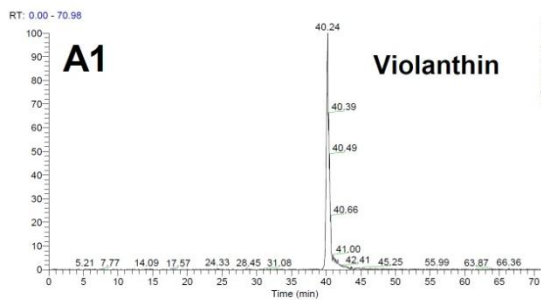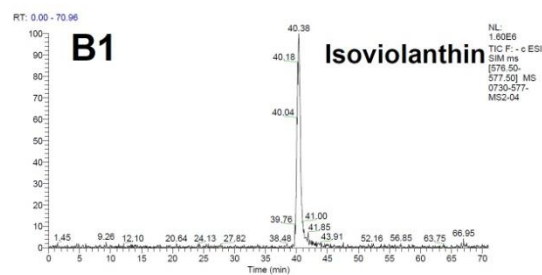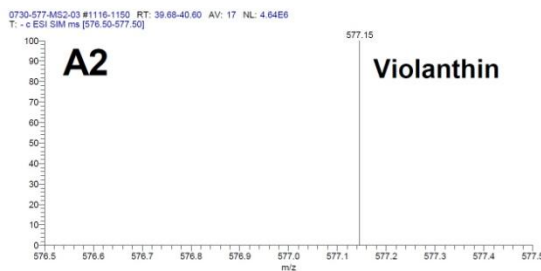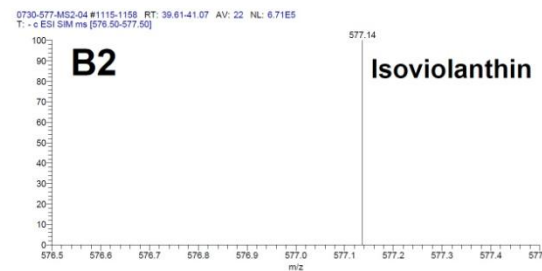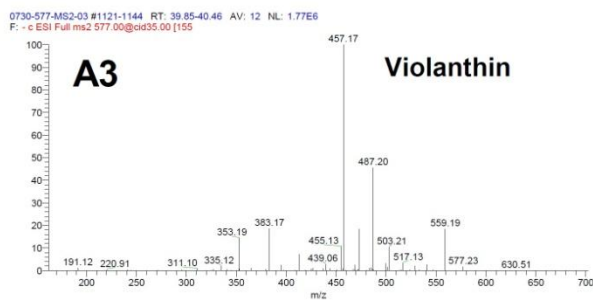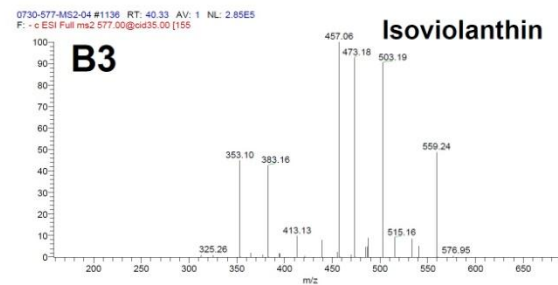

1  
2  
3  
4  
5  
6

**Supporting Fig.5** LC-MS chromatograms (1) LC-MS spectrums (2) and LC-MS<sup>2</sup> spectrums (3) of violanthin (A) and isoviolanthin(B) from the stem of *D. officinale* (negative ion mode)

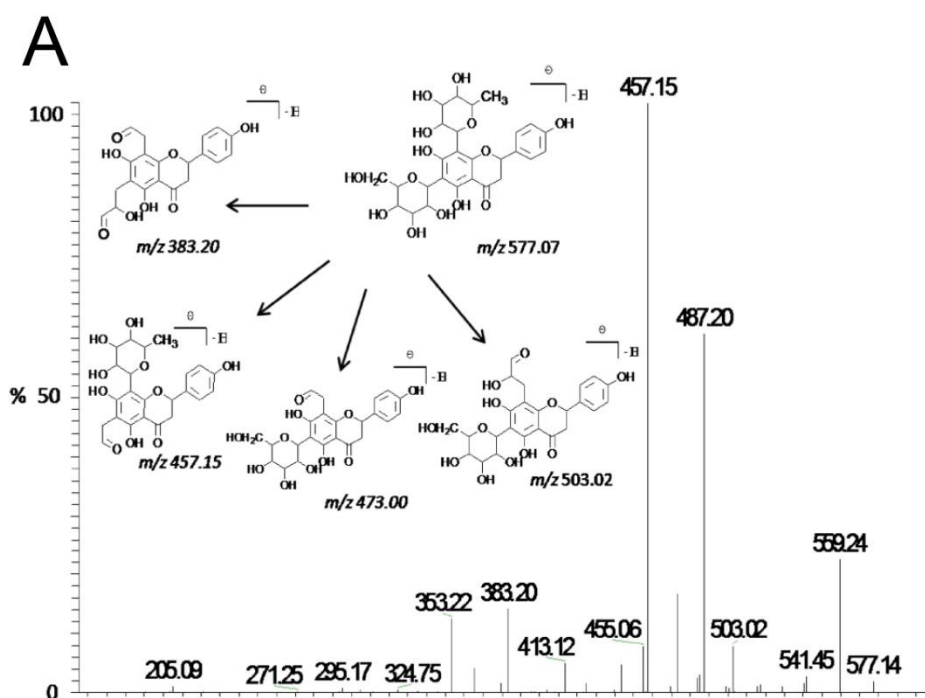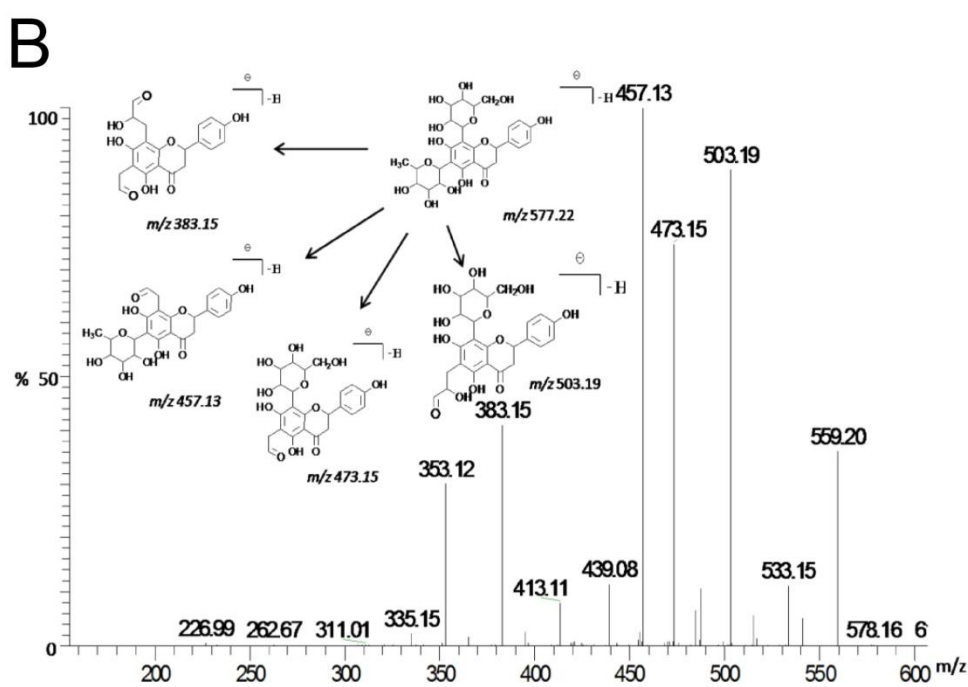

1  
 2 **Supporting Fig.6 The MS spectra and the characteristic fragmentation pathway of**  
 3 **violanthin and isoviolanthin.** Violanthin (A; compound 19) and isoviolanthin (B;  
 4 compound 20) were shown here.

5
